# Supplementary material
Source: Springer Nature journal article supplement (https://www.springermedizin.de/resource/supplementary/12958_2013_1085_MOESM3_ESM.pdf/9566756)

**A**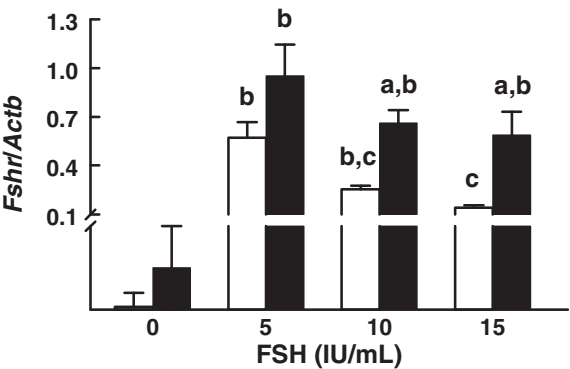**B**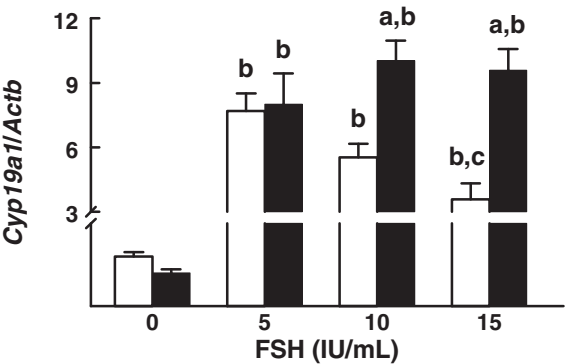**C**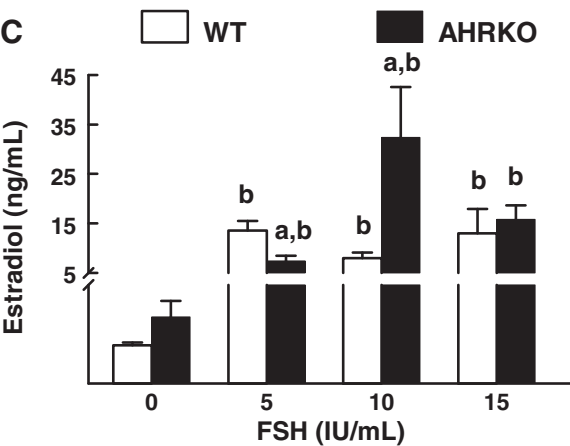

Supplement: MOESM3 [file 9566756]
